# Supplementary material for: Engineering a 3D vascular network in hydrogel for mimicking a nephron
Source: Royal Society of Chemistry journal article supplement (doi:10.1039/c3lc41342j), 2013-01-01
Supplement: c3lc41342j.pdf [file c3lc41342j.pdf]

1 **Supplementary material**

2

3 **Engineering 3D vascular network in Hydrogel for mimicking Nephron**

4 Authors : Xuan Mu<sup>1,2</sup>, Wenfu Zheng<sup>1</sup>, Le Xiao<sup>1</sup>, Wei Zhang<sup>1,\*</sup> and Xingyu Jiang<sup>1,\*</sup>

5

6 Affiliation:

7 <sup>1</sup>National Center for NanoScience and Technology, 11 Beiyitiao, ZhongGuanCun,

8 Beijing 100190, PR China

9 <sup>2</sup>Institute of Basic Medical Sciences, Chinese Academy of Medical Sciences; School

10 of Basic Medicine, Peking Union Medical College, 5 Dong Dan San Tiao, Beijing

11 100005, PR China

12

13 E-mail: [xingyujiang@nanoctr.cn](mailto:xingyujiang@nanoctr.cn) (X.Y. Jiang); [zhangw@nanoctr.cn](mailto:zhangw@nanoctr.cn) (W. Zhang);

14

15 This PDF file includes:

16 Figures S1 to S13

17 Tables S1 to S2

18 Six additional references

19

20 Other supporting information include:

21 Movies 1-3 in MPG

22

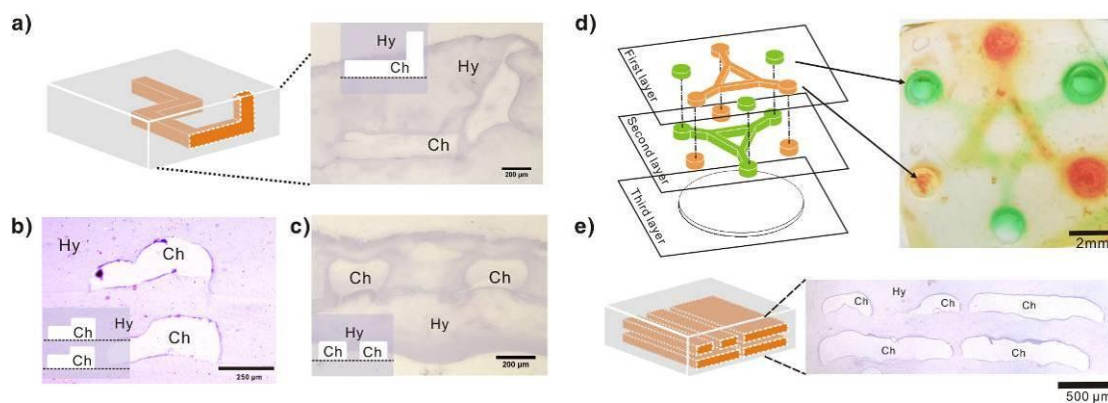

1  
 2 Fig. S1. Hydrogel microchannels with multiple layers and overlapping structures. a)  
 3 Hematoxylin and eosin (H&E)-stained hydrogel microchannel with a reservoir  
 4 (vertical microchannel); b) two vertically parallel hydrogel microchannels; c) two  
 5 parallel hydrogel microchannels; d) Left: Schematics demonstrate the structures of  
 6 multilayer hydrogel with 3D microchannels. Right: microchannels on different layers  
 7 perfused with orange and green dye solutions, respectively; (e) Schematic illustration  
 8 and hematoxylin and eosin (H&E) staining show the inner 3D network of  
 9 microchannels within multilayer hydrogels. “Hy” and “Ch” mean hydrogel and  
 10 channel, respectively.

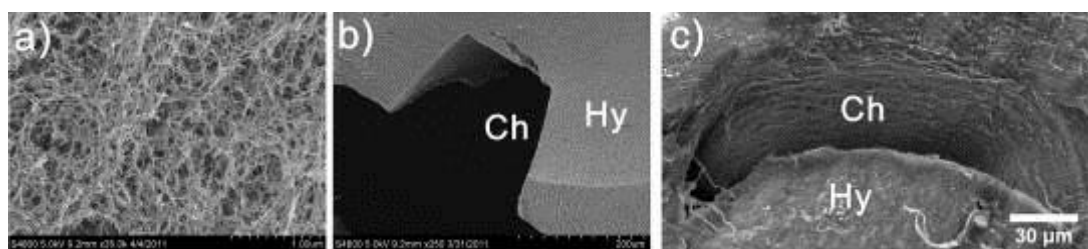

11  
 12 Fig. S2. SEM images of hydrogel and hydrogel vascular network. a) Nanostructure of  
 13 collagen fibrils in porous morphology; b) embossed structure in gelled hydrogel layer  
 14 (HL in Fig. 1); c) a cross-section of enclosed hydrogel channel with 30 µm height. Hy  
 15 and Ch mean hydrogel and channel, respectively.

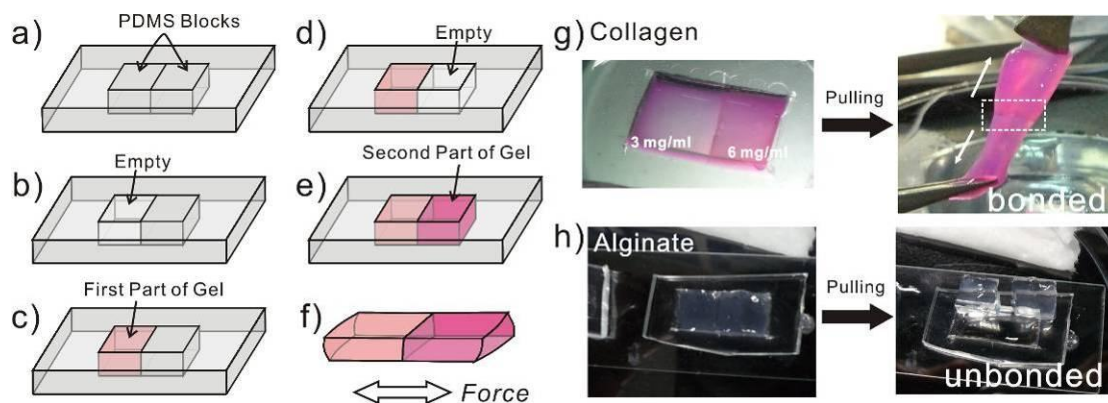

16  
 17 Fig. S3. a)-f) the schematics show the procedure to test the bonding of gels. The  
 18 sequentially formed gels can potentially bond along the interface, and would be tested

1 by a pulling force; g) Right: Gel two collagen blocks sequentially in a PDMS mold.  
2 Collagen with light red indicates concentration of 3 mg/ml; collagen with dark red  
3 indicates 6 mg/ml; Left: pulling collagen gel with forceps. The bonded structure is  
4 deformed under stressing, while collagen gels maintain connected; the dashed white  
5 box shows the interface of collagen gels; h) Left: apply the same processes to  
6 fabricate pure alginate gel; Right: pulling alginate gels would completely break from  
7 the interface at the middle. These experiments confirm the positive role of collagen  
8 rather than alginate in bonding hydrogels.

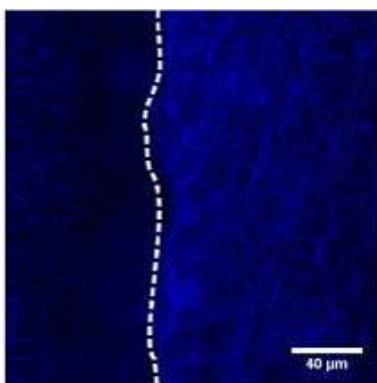

9  
10 Fig. S4. Confocal Reflectance Microscopy (CRM) image of bonded hydrogel layers.  
11 The dimension nears the limitations of current employed microscopy, which may be  
12 improved by the microscopy with higher resolution. The fibrils of collagen along the  
13 interface are fewer than in the gel, because the interface only provides nucleating sites.  
14 The empty in bottom left in Figure 2B and in left in Figure S3 is perhaps due to the  
15 out of focus of the hydrogel. White dash line indicates the interface of hydrogels.

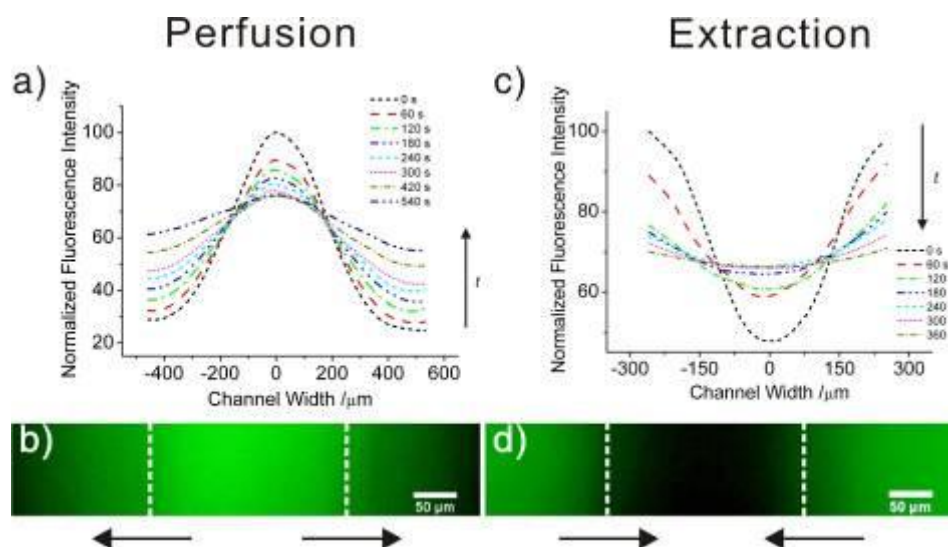

16  
17 Fig. S5. Mass transfer by convection flow in hydrogel vasculature in two modes of  
18 perfusion and extraction. a)-b) top: the perfusion of FITC-dextran (10k Da) from  
19 channel to bulk hydrogel; bottom; the typical fluorescence images; the arrows indicate  
20 the direction of mass transfer; c)-d) top: the extraction of FITC-dextran from bulk  
21 hydrogel to channel; bottom: the typical fluorescence images; the arrows indicate the

1 direction of mass transfer.

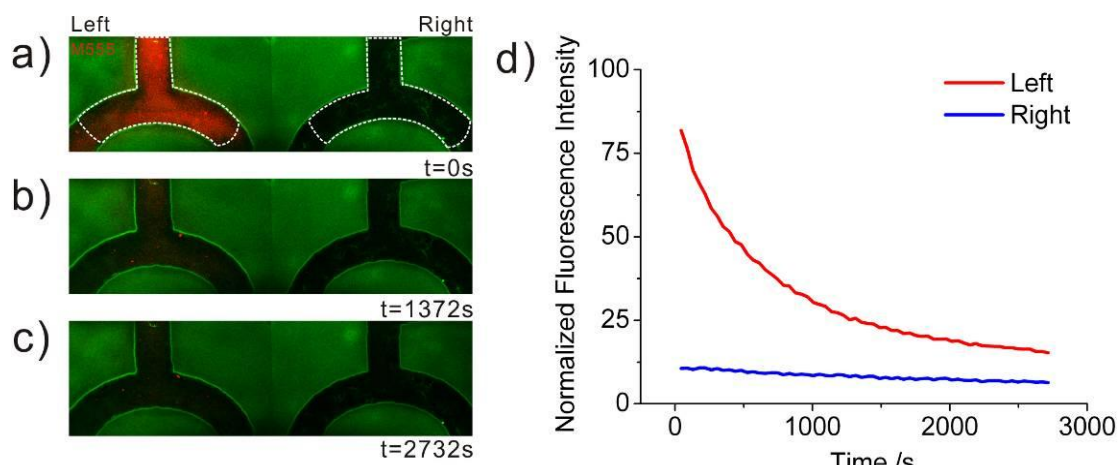

2

3 Fig. S6. a)-c) The mass transfer of red fluorescence dye from left microchannel to  
4 hydrogel, compared with right empty microchannel; d) the fluorescence dye gradually  
5 diffuse into the hydrogel. Region of interest (ROI) is indicated by white dash box.

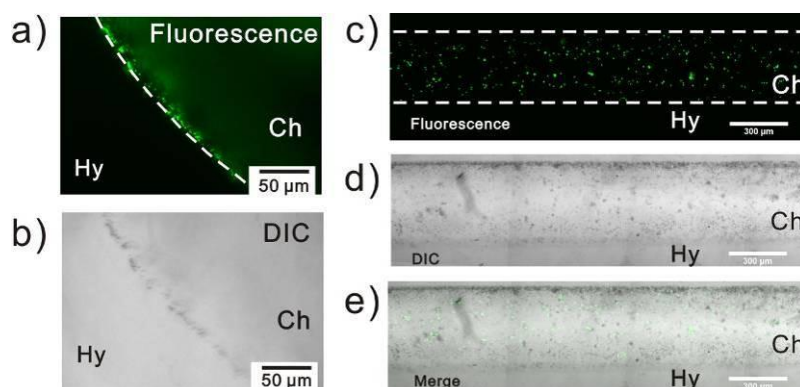

6

7 Fig. S7. Verify the tightness of hydrogel channels by perfusing 1 μm FITC-labeled  
8 Latex beads. a), c) Fluorescence image; b), d) Differential interference contrast (DIC)  
9 image; e) Merged image of c) and d). The beads are aggregated along the boundaries  
10 of microchannels, indicated by Dash lines. These results show that the hydrogel  
11 microchannels are not leaky to objects larger than 1 μm.

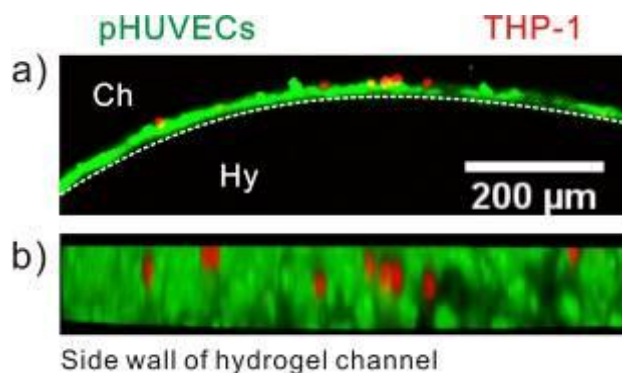

12

13 Fig. S8. Perfuse THP-1 in red fluorescence into hydrogel channels covered with

1 pHUVECs in green fluorescence. (a) Confocal image of a side wall of hydrogel  
2 channel. White dash line indicates the boundary of microchannel. (b) Confocal  
3 reconstructed 3D image of side wall. Hy and Ch means hydrogel and Channel,  
4 respectively.

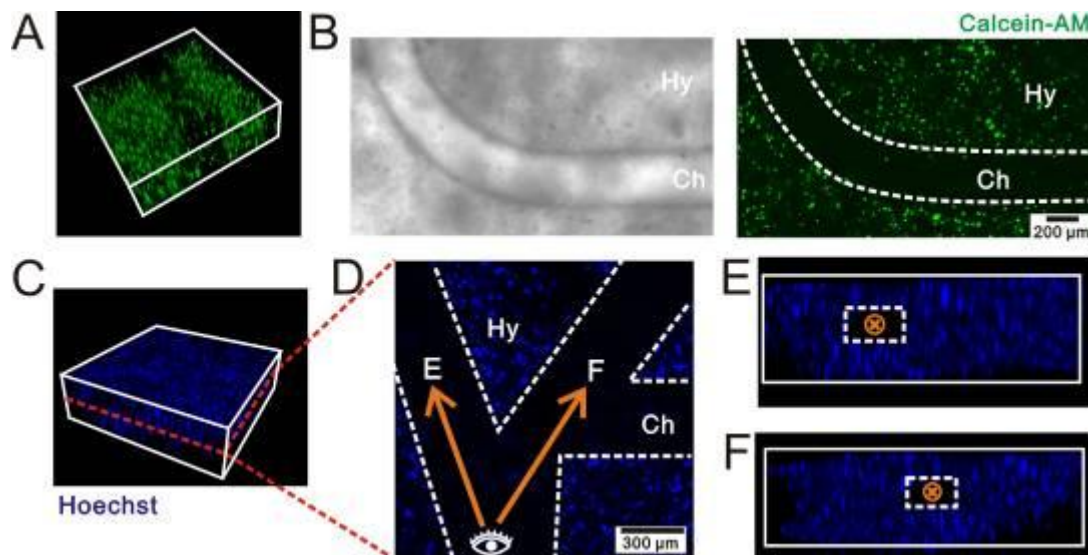

5  
6 Fig. S9. Cell-laden hydrogel vascular network. (A and B) A curve microchannel  
7 surrounded by pHUVECs that are stained with Calcein AM to show high viability and  
8 continued metabolic activity after 24 hours. (C) Reconstructed 3D image of a NIH  
9 3T3 cell-laden hydrogel vasculature. (D) The branched hydrogel microchannels. (E  
10 and F) Images of the hydrogel vasculature along with orange arrows in (D). We could  
11 look through the entire hydrogel scaffold along different directions indicated by the  
12 orange arrows. The nucleus of cells is stained with Hoechst 33342 to present blue.  
13 “Hy” and “Ch” indicate hydrogel and channel, respectively. Dash lines indicate  
14 boundaries of microchannels.

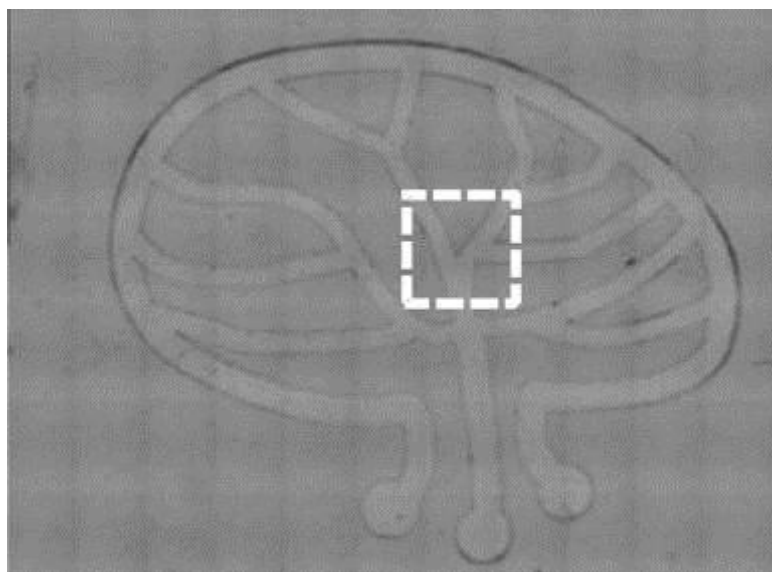

1

2 Fig. S10. The DIC image of a whole hydrogel vascular network (Figure 1F). The  
3 white dashed box indicates the position of Fig. S9C.

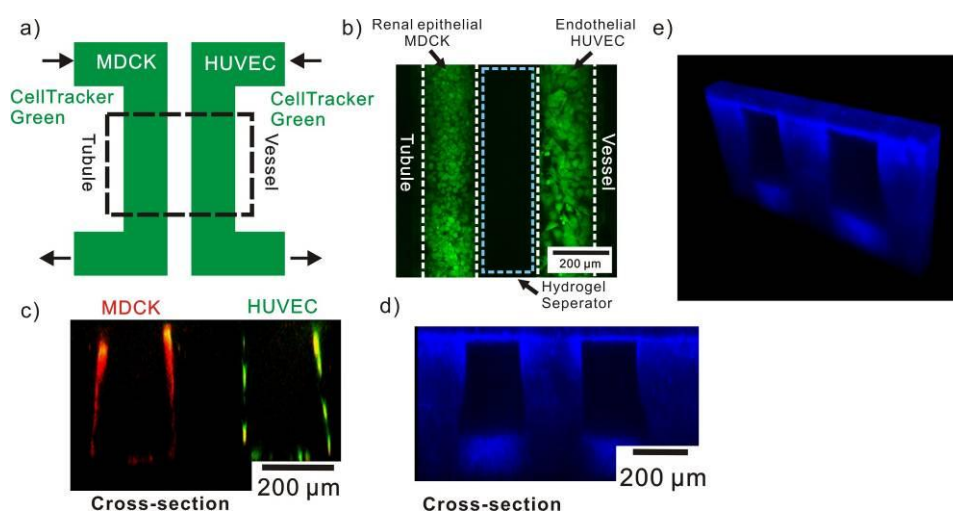

4

5 Fig. S11. a) Schematic graph of staining cells inside independent hydrogel  
6 microchannels with CellTracker Green; b) The fluorescent image of the cells in  
7 hydrogel microchannels as tubules and vessels, the position of which indicated in the  
8 black dash box in a). White dash lines indicate the boundaries of microchannel, and  
9 blue dash box indicate the hydrogel between two channels; c) and d) the individual  
10 fluorescent image and CRM image of Figure 4C; e) the 3D reconstructed image of the  
11 hydrogel microchannels of d).

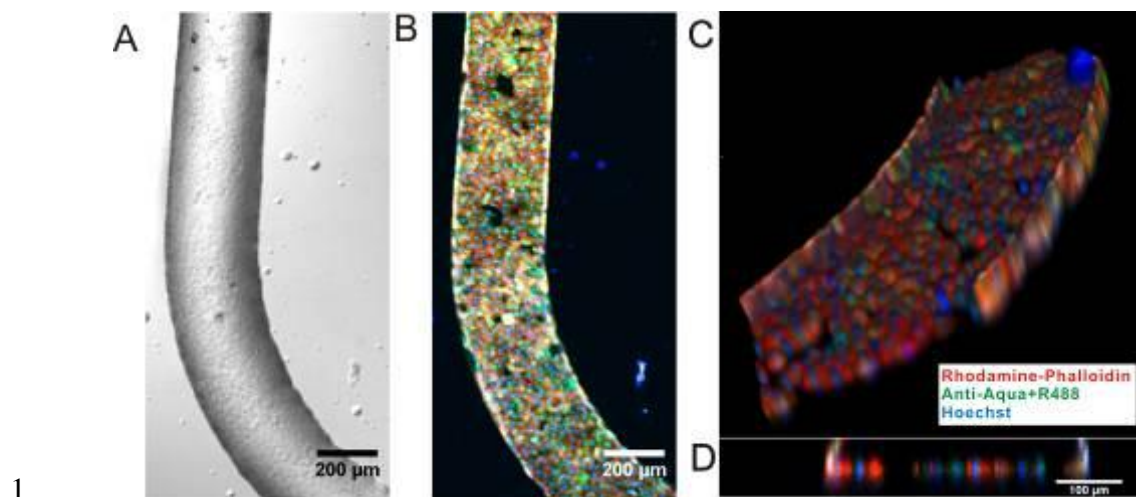

1  
2 Fig. S12. Culture Madin-Darby canine kidney (MDCK) cells in a curve PDMS  
3 microchannel for over ten days. A and B. DIC and fluorescence images of MDCK in  
4 the PDMS channel. C and D. Confocal images.

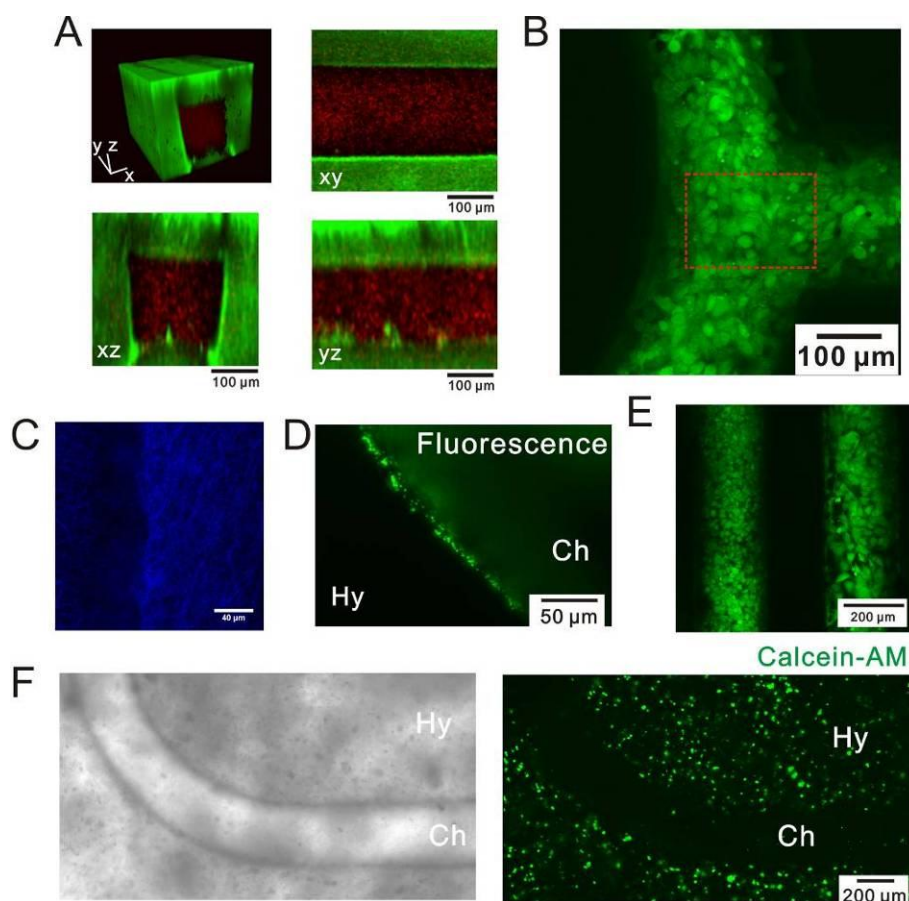

5  
6 Fig. S13. A to F show the images ( 2-F, 3-C, S3, S7-A, S9-B, and S13-B) without  
7 whitelines.

8

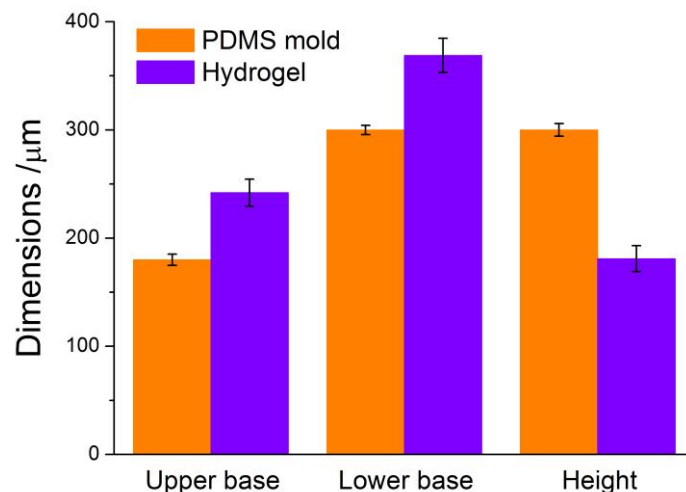

1

2 Figure S14. Comparison of the dimension of PDMS and the replicated hydrogel  
3 channel (n=3).

4

#### 5 **Quantitative mass transfer**

6 According to Stokes-Einstein equation showing as follow,

$$7 \quad D_t = \frac{\kappa T}{6\pi\eta r}$$

8 we can calculate theoretical diffusion coefficient of FITC-dextran (10k Da),  $D_t$ , is  
9  $9.7 \times 10^{-11} \text{ m}^2/\text{S}$ .

10

11 where  $\kappa$  is Boltzmann's constant ( $1.38 \times 10^{-23} \text{ kg m}^2/\text{K S}^2$ ),  $T$  is absolute temperature  
12 (273 K),  $\eta$  is viscosity of solution ( $0.89 \times 10^{-3} \text{ kg/m S}$ ) and  $r$  is the radius of the  
13 molecule (23 Å).

14

15 Fluorescence recovery after photobleaching (FRAP) could yield experimental  
16 diffusion coefficient  $D$  according to the equation below

$$17 \quad D = \frac{w^2}{4t_{1/2}}$$

18 where  $w$  is the radius of the laser beam and  $t_{1/2}$  is time required for recovery to half of  
19 initial intensity. The experimental results are listed in Table S1.

20

**Table S1. Diffusion coefficient in water and hydrogel**

|                          | $w \text{ } \mu\text{m}$ | $t_{1/2} \text{ S}$ | $D \text{ m}^2/\text{S}$ |
|--------------------------|--------------------------|---------------------|--------------------------|
| $D_{\text{in water}}$    | 15                       | 0.4                 | $1.40 \times 10^{-10}$   |
| $D_{\text{in hydrogel}}$ | 20                       | 7                   | $1.43 \times 10^{-11}$   |

21 The theoretical  $D_t$  is nearly 70% of experimental  $D_{\text{in water}}$ .  $D_{\text{in water}}$  is significantly  
22 larger than  $D_{\text{in hydrogel}}$ , because the polymeric network of hydrogel would hinder  
23 diffusion.



1

2 **Comparison of biomimic nephron and real renal physiology**

**Table S2. Comparison of kidney, nephron and biomimetic nephron**

| Features                       | Kidney                                                                                                                   | Nephron                                                                         | Biomimetic Nephron                                    |
|--------------------------------|--------------------------------------------------------------------------------------------------------------------------|---------------------------------------------------------------------------------|-------------------------------------------------------|
| Numbers of Nephron             | 1,000,000 <sup>a</sup> [2]                                                                                               | 1                                                                               | 1                                                     |
| The inner surface of tubule    | 600,000 mm <sup>2</sup> <sup>a</sup> [2]                                                                                 | 0.6 mm <sup>2</sup> <sup>a</sup> [2]<br>3.7629 mm <sup>2</sup> <sup>b</sup> [3] | 13.6 mm <sup>2</sup>                                  |
| Density of tubule              | 1000/mm <sup>2</sup> <sup>c</sup> [4]<br>600/mm <sup>2</sup> <sup>d</sup> [4]                                            |                                                                                 | 4/ mm <sup>2</sup>                                    |
| Diameter of tubule             | 30-40 μm <sup>acd</sup> [5]                                                                                              |                                                                                 | 30-200 μm                                             |
| The rate of Blood flow         | 1200 ml/min <sup>a</sup> [2]                                                                                             | 0.0012 ml/min <sup>e</sup>                                                      | 0.003 ml/min                                          |
| Thickness of basement membrane | 70-250 nm <sup>a</sup> [5]                                                                                               |                                                                                 | 200 μm                                                |
| Diffusion Coefficient          | 2.0-4.1×10 <sup>-9</sup> m <sup>2</sup> /s <sup>af</sup><br>1.9-5.1×10 <sup>-9</sup> m <sup>2</sup> /s <sup>ag</sup> [6] | NA                                                                              | 1.43×10 <sup>-11</sup> m <sup>2</sup> /s <sup>h</sup> |

3

4

5

6

7

8

9

10

11

12

13

14

15

16

17

18

19

<sup>a</sup> Human; <sup>b</sup> Necturus Maculosus; <sup>c</sup> Rat; <sup>d</sup> Rabbit; <sup>e</sup> Calculated by the number of nephron and blood rate in kidney; <sup>f</sup> Cortes; <sup>g</sup> Medulla; <sup>h</sup> bulk hydrogel.

[1] Boontheekul T, Kong HJ, Mooney DJ. Controlling alginate gel degradation utilizing partial oxidation and bimodal molecular weight distribution. *Biomaterials*. 2005;26:2455-65.

[2] Wolf AV. The artificial kidney. *Science*. 1952;115:193-9.

[3] Kempton RT. The dimensions of the renal tubules of *Necturus maculosus*. *Journal of Morphology*. 1937;61:51-8.

[4] Knepper MA, Danielson RA, Saidel GM, Post RS. Quantitative analysis of renal medullary anatomy in rats and rabbits. *Kidney International*. 1977;12:313-23.

[5] Tisher CC, Madsen KM. Brenner and Rector's *The Kidney*. 8th ed: Saunders; 2007.

[6] Zhang JL, Sigmund EE, Chandarana H, Rusinek H, Chen Q, Vivier PH, et al. Variability of Renal Apparent Diffusion Coefficients: Limitations of the Monoexponential Model for Diffusion Quantification. *Radiology*. 2010;254:783-92.
